# Supplementary material for: Dynamic Changes in Tooth Displacement and Bone Morphometry in Orthodontic Tooth Movement in Rats: A 3D Analysis
Source: Research Square preprint supplement (doi:10.21203/rs.3.rs-1300526/v1), 2022-02-15
Supplement: Supplementary file 1 [file 7eadc285f3d1948368462273.docx]

**Supplementary Figure 1.**


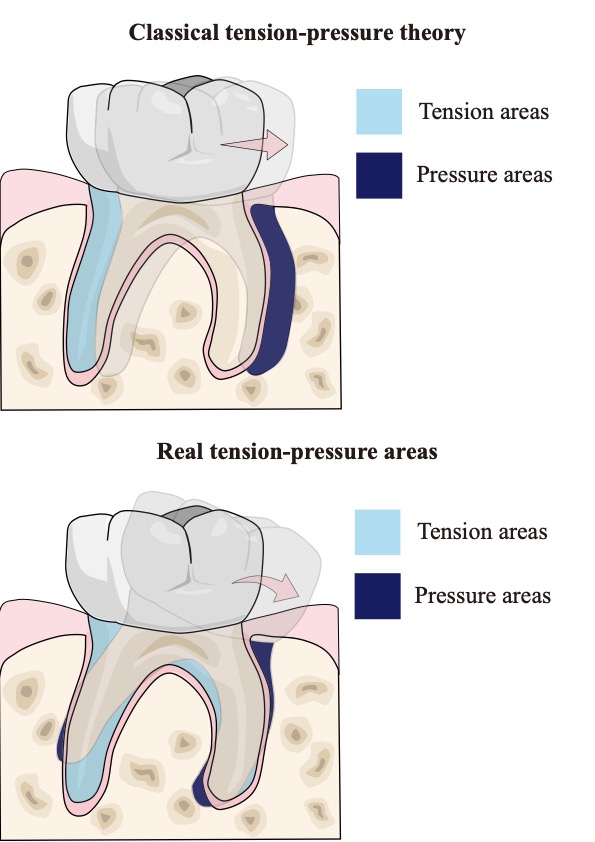


When the tooth moves mesially, classical tension-pressure theory claims that pressure and tension areas are the mesial and distal root areas. However, pure mesial body movement hardly exists, so the OTM is a mixture of body movement and angular movement. In this condition, the real tension-pressure areas are not distributed in two opposite sides, but actually dispersed, adjacent and widely connected in both mesial and distal sides.
